# Supplementary material for: Water-use characteristics of Syzygium antisepticum and Adinandra integerrima in a secondary forest of Khao Yai National Park in Thailand with implications for environmental management
Source: PeerJ. 2023 Nov 30;11:e16525. doi: 10.7717/peerj.16525 (PMC10693818; doi:10.7717/peerj.16525)
Supplement: Data S1 — The daily sap flow of the two species in this study along with environmental factors (vapor pressure deficit and relative extractable water) that were considered in the analysis. Further description of the headings is also included [file peerj-11-16525-s001.xlsx]

## Sheet: Raw data
Year	DOY	VPD (kPa)	REW	T1	T2	T3	T4	T5	T6	T7	T8	T9
2020	270	0.383393	0.542391	1.51433	3.39629	8.51474	1.8259	13.7613	4.89484	26.9356	13.4523	23.2847
2020	271	0.357422	0.514997	13.7413	2.84165	7.24862	4.89561	14.5371	43.4281	35.4836	13.7794	21.5239
2020	275	0.273807	0.582784	13.3145	2.3978	7.48923	1.51985	11.1927	33.3698	26.2932	11.6598	17.9442
2020	295	0.0254944	0.64367	4.96888	1.99298	3.64679	0.71488	5.72952	NaN	12.2957	6.56321	14.1573
2020	297	0.489304	0.594852	17.4852	5.65784	1.19292	2.65632	21.2238	NaN	41.95	2.51858	NaN
2020	298	0.633934	0.567089	19.7934	6.62771	1.95384	2.64249	25.4777	NaN	48.6323	23.3981	NaN
2020	299	0.697639	0.541653	17.6235	6.52243	11.6575	3.16742	23.7756	NaN	43.8787	2.35182	NaN
2020	300	0.476485	0.519892	14.1665	5.65845	8.15744	2.34523	13.7557	NaN	29.8524	13.3862	NaN
2020	302	0.158458	0.521047	15.379	5.78942	8.35166	2.76592	15.375	NaN	31.7163	15.3818	NaN
2020	307	0.196541	0.700913	15.6759	6.11744	7.57816	3.26483	16.2159	NaN	36.3875	15.6656	NaN
2020	308	0.435363	0.643429	17.8234	4.74517	9.68947	3.88447	25.3898	NaN	39.3265	18.6921	NaN
2020	309	0.453366	0.606085	18.8597	6.51857	15.2779	4.52629	27.8463	NaN	45.6445	18.9697	NaN
2020	310	0.394213	0.57959	2.21924	5.75272	16.3187	3.7176	21.2352	NaN	41.3358	19.7862	NaN
2020	311	0.459864	0.560188	16.4758	5.76128	8.23564	2.73454	14.1858	NaN	33.1913	13.2613	NaN
2020	312	0.438027	0.54491	7.61636	3.71122	6.69716	1.86578	9.23333	NaN	18.3549	7.9183	NaN
2020	313	0.335921	0.534463	11.9779	5.24211	6.41188	2.66494	13.6476	9.84195	26.466	1.25263	NaN
2020	314	0.48191	0.516939	13.1937	5.38666	8.94158	3.37585	19.4251	14.8419	27.4339	17.2812	13.2396
2020	315	0.561321	0.498837	16.4233	4.93226	1.43492	4.18129	25.9915	18.5836	33.9115	21.5142	17.8428
2020	316	0.845092	0.383591	7.86214	4.16342	6.8366	2.29475	8.21932	16.6816	2.76831	1.59623	1.72724
2020	319	0.974323	0.413696	16.2426	4.65439	1.62532	3.88495	27.7547	19.7669	32.2659	19.3164	15.8536
2020	320	1.12319	0.381151	22.5855	6.94246	14.2473	4.45113	34.3736	22.2827	44.67	23.6629	2.2646
2020	321	0.622077	0.356865	14.2794	5.41995	8.55476	3.1647	15.3254	15.4811	33.312	15.9213	15.5815
2020	322	0.391924	0.341438	16.5883	5.56628	17.6748	3.54739	19.9784	18.1576	39.8959	15.6346	16.2132
2020	323	0.407021	0.288297	14.9835	5.38922	24.2511	3.4256	18.9918	16.4296	46.5849	14.3989	15.2841
2020	324	0.351435	0.276925	18.9861	4.61842	23.2663	3.58939	29.1364	21.8277	48.7529	19.6213	17.7864
2020	325	0.584982	0.263492	18.8612	4.96258	11.6963	3.68218	3.41843	2.33592	44.199	16.6762	17.3481
2020	326	0.586035	0.244668	18.1254	5.22543	8.56447	2.89974	19.9384	18.4943	4.31973	16.7499	16.1569
2020	327	0.491558	0.233595	14.5785	5.13163	7.17937	2.67616	15.2275	14.4756	36.2198	13.2465	13.57
2020	328	0.279816	0.223774	22.3914	5.18587	9.61372	3.79453	32.4776	2.769	42.7278	19.8333	17.3312
2020	329	0.518733	0.21185	21.7194	5.48152	9.53185	3.25962	3.8217	2.66968	4.96932	19.2758	17.9362
2020	330	0.540937	0.216327	18.5235	6.27754	9.62297	3.18469	23.9387	18.2258	36.3816	18.3258	15.5964
2020	331	0.52538	0.203981	16.743	5.55912	8.86	2.7967	25.9158	17.8999	27.7526	13.5342	13.8275
2020	332	0.599631	0.190886	11.2262	6.65324	6.33816	1.98165	12.8677	1.14332	23.4836	9.29119	8.88174
2020	333	0.52907	0.181599	14.9977	4.25187	7.69312	2.96613	28.5455	15.3987	33.6498	13.5564	12.1846
2020	334	0.569029	0.169488	14.1571	4.98768	7.68465	2.63932	16.9244	13.6839	3.98217	12.5882	11.8934
2020	335	0.547651	0.14304	13.8123	4.26513	7.48559	2.76896	25.2349	12.6985	25.4226	13.4387	1.47387
2020	336	0.595711	0.13514	9.58625	4.34776	5.88322	1.96613	11.7142	7.53124	18.7313	9.14349	8.61684
2020	337	0.374926	0.138141	12.5767	3.83387	6.93233	2.67519	18.1729	11.5613	26.8676	13.6745	11.5953
2020	338	0.405101	0.130224	12.123	3.87468	7.13823	2.37926	18.2618	11.2147	25.372	1.71422	11.9938
2020	339	0.499693	0.122971	13.6318	4.16142	7.95778	2.68144	23.6535	12.1948	29.3894	12.3492	13.3813
2020	340	0.576843	0.113492	18.9559	5.2754	9.81263	3.39896	29.4424	15.4746	34.7114	17.2848	14.5693
2020	341	0.447306	0.106666	2.8164	5.52912	11.6486	3.19153	26.6866	19.3895	42.3434	21.8893	17.8626
2020	342	0.539501	0.102215	22.1439	5.53628	12.3175	3.16557	36.7319	2.93246	57.4725	21.5115	18.3543
2020	343	0.502487	0.0969514	18.6532	6.97351	11.2675	3.25274	25.6297	16.1356	4.15494	19.8695	16.1381
2020	344	0.370244	0.0931213	22.679	5.12176	11.1375	2.97583	28.7675	15.6589	47.4393	2.22878	19.1533
2020	345	0.53353	0.0886492	23.7668	6.42796	11.4178	3.39639	34.3177	29.6942	48.6887	21.3436	18.2772
2020	346	0.832325	0.0862313	19.8324	5.74893	9.48238	2.98814	22.2743	1.57637	38.9487	17.7943	15.8593
2020	347	0.4841	0.082337	18.6856	4.24435	8.83174	2.26629	15.2414	19.1881	38.1136	15.5653	16.5261
2020	348	0.4638	0.0815453	19.4387	4.12522	8.53536	2.22157	16.6681	27.3445	41.7515	15.8623	16.2745
2020	349	0.410508	0.0792986	13.9688	3.96766	6.61297	1.38884	11.2133	12.1496	24.3512	1.62378	11.1579
2020	350	0.440378	0.0785069	22.23	6.5495	9.52646	3.95848	22.975	19.9747	4.45426	2.53982	16.8379
2020	351	0.521801	0.0759392	19.6719	7.22949	9.72543	2.94477	23.2712	16.4535	35.7598	21.3742	15.5549
2020	352	0.416131	0.072537	21.9726	5.98133	1.16692	3.31366	25.3635	17.8747	42.6238	21.2418	17.428
2020	353	0.416468	0.0685785	23.1842	5.99718	1.61516	2.84582	27.5217	19.9295	44.1596	21.4945	18.1346
2020	354	0.48384	0.0649624	18.6488	5.73937	8.98367	2.77656	24.9399	16.9179	38.7768	18.1569	16.976
2020	355	0.440712	0.0622021	15.1116	4.62498	8.47663	2.7959	21.7215	13.4472	31.6976	14.8712	15.8357
2020	356	0.463917	0.0595274	15.1874	5.17473	9.19215	3.91514	2.75846	13.1462	31.4734	17.7632	14.8589
2020	357	0.503098	0.0574305	17.7974	6.68338	1.57328	3.18272	25.7292	17.1138	35.8841	2.21555	16.8897
2020	358	0.60216	0.0555903	23.1247	8.37369	1.29843	3.68432	22.5129	18.5257	4.82418	19.7588	17.7188
2020	359	0.55102	0.0545419	23.2922	5.74449	9.63393	3.54373	22.9239	18.8654	4.35136	19.313	18.1513
2020	360	0.568774	0.0536646	18.3596	5.84319	7.86137	2.19935	16.2876	14.8426	32.9955	15.1164	15.5734
2020	361	0.447743	0.0536646	21.4668	5.67958	9.638	2.89139	18.9757	17.7142	37.3719	17.1499	17.4766
2020	362	0.333442	0.053044	19.2448	6.24281	7.56476	2.18747	15.7523	17.6743	37.2476	14.6319	15.8583
2020	363	0.374584	0.052124	2.59792	6.98521	8.69213	2.51825	19.5773	18.2373	37.9396	16.4248	16.7454
2020	365	0.787856	0.0497916	24.7155	4.88926	11.2459	4.25917	26.2167	22.7786	45.4456	2.46568	21.7666
2020	366	0.728226	0.0464537	15.2328	2.29642	8.19133	2.93412	17.1295	14.7339	4.25988	16.6866	17.3194
2021	1	0.423852	0.0425593	14.8497	2.31443	7.68869	2.5454	17.2767	15.9675	34.4697	17.2275	17.4996
2021	2	0.451918	0.0411471	17.9954	2.91629	1.61264	3.4552	21.7545	17.5976	35.6763	18.3365	16.5497
2021	3	0.65269	0.040227	22.5577	3.36419	12.9248	4.59112	24.1773	2.43987	42.2416	2.6495	18.5237
2021	4	0.641803	0.0384724	21.6821	3.31783	11.5736	3.98482	23.6424	18.3846	36.7888	19.3682	16.7764
2021	5	0.604474	0.0380231	21.2359	3.15324	9.99291	3.19724	16.1266	17.2345	35.4734	18.5942	16.9378
2021	6	0.690973	0.0377235	23.439	3.61523	12.2498	4.46957	22.3681	2.22223	43.1478	2.32915	17.8237
2021	7	0.647223	0.0350703	25.2226	3.73184	12.2435	4.84713	21.2829	21.5851	4.16629	17.8796	17.1156
2021	8	0.571155	0.0343855	19.5189	2.96948	1.57245	3.35314	16.3797	17.7263	32.5933	17.5126	15.5414
2021	9	0.394241	0.032738	19.4753	2.76812	1.91443	3.39768	23.2518	18.5336	34.7164	18.3674	17.2621
2021	10	0.49795	0.0307908	23.857	2.85372	12.3495	3.4945	26.1545	22.2433	39.3513	22.2384	18.216
2021	11	0.533924	0.0295283	19.3933	2.26653	11.7411	2.97494	19.2966	19.6313	34.3648	16.3614	16.4837
2021	12	0.480932	0.0226083	16.4878	2.63697	12.4732	2.52816	15.4494	15.5525	27.2864	18.3916	14.2225
2021	13	0.569725	0.025955	21.4337	3.42625	14.4684	2.38594	2.26652	2.79487	32.7994	19.3889	16.4679
2021	14	0.563365	0.0248637	26.9581	3.11617	15.7164	2.38413	23.4975	23.7248	42.4673	17.1671	17.7515
2021	15	0.610278	0.0253773	25.8527	2.71616	14.2548	2.63384	18.9877	22.3242	37.3899	16.9212	21.2272
2021	16	0.623309	0.0253131	22.3512	2.53384	11.9826	1.7735	14.8618	2.82597	35.7662	16.1447	2.51685
2021	17	0.532123	0.0248851	17.548	2.97897	9.92628	1.61365	11.5453	18.3822	27.6798	13.5173	19.3273
2021	18	0.689679	0.024393	15.5285	2.43154	8.69718	1.49185	9.91739	14.4667	29.5817	16.8766	13.7579
2021	19	0.439519	0.0220821	2.61718	2.83575	11.1233	2.15387	12.8224	19.1743	34.9774	19.3513	2.53789
2021	20	0.464659	0.021376	22.656	2.75571	12.1235	1.98599	13.3528	11.9213	36.1794	15.9259	21.2132
2021	21	0.508783	0.0209908	22.7279	2.78779	12.2587	2.92822	13.729	12.3426	34.6129	16.9196	2.28818
2021	22	0.693952	0.0205415	24.7385	2.71136	12.2977	1.92874	12.8466	12.6418	33.2267	14.7418	21.4166
2021	23	0.713874	0.0205201	24.3538	2.67529	11.3427	2.11586	11.3594	2.23146	32.2515	15.1249	21.2319
2021	24	0.688418	0.0206698	23.8579	2.6484	11.5394	1.93568	12.8974	19.3172	33.9246	17.3456	2.94142
2021	25	0.510189	0.0213332	21.3789	2.47999	1.46518	1.74644	11.3948	18.4318	31.3833	14.1334	19.2186
2021	26	0.506469	0.0208838	22.1874	2.86798	1.72156	2.21132	11.5912	21.4925	32.9362	15.7979	19.8236
2021	27	1.04674	0.0198781	25.5687	2.79445	12.3269	2.23755	13.1238	22.1271	36.3617	19.2162	23.1383
2021	28	0.825005	0.0190222	23.7965	2.46336	1.78383	2.84869	13.7194	21.8458	31.825	18.4877	21.7151
2021	29	0.972421	0.017824	2.16766	2.76149	1.44395	1.77523	11.6788	17.3888	32.6245	18.2262	18.6168
2021	30	0.629675	0.0159624	22.1572	2.93126	1.32915	1.76673	11.9369	21.1814	33.2867	15.3187	21.7173
2021	31	0.707687	0.014914	24.9464	2.94569	11.2618	2.16615	12.6518	22.5698	35.3647	17.2223	18.1834
2021	32	0.736099	0.0145288	26.1859	2.82249	11.8497	2.15841	13.9193	23.6686	37.7652	17.1532	23.7347
2021	33	0.830813	0.0137585	24.6866	2.61139	1.83112	1.82528	13.4277	2.52647	33.2878	14.4714	21.1332
2021	34	1.12618	0.0130524	22.7675	2.79258	11.3488	1.83544	13.2641	23.2688	33.7542	17.2124	21.9225
2021	35	1.1133	0.0108271	22.4364	2.5146	11.9648	1.59852	13.1486	24.5152	35.2843	23.6789	22.6817
2021	36	0.997596	0.00930785	27.4463	2.53765	12.1665	1.98298	12.8892	25.8746	36.5524	25.3848	24.6662
2021	37	1.12772	0.00858034	22.8136	2.26863	11.6125	1.69793	1.23542	22.4238	33.1438	21.2869	24.3216
2021	38	0.879615	0.00798121	22.6698	1.98764	9.71957	1.4835	9.46348	2.83342	32.8987	17.6192	23.9644
2021	39	0.794649	0.00733929	18.2325	1.68522	7.39264	1.32823	7.52426	16.6931	25.8358	15.7135	19.3435
2021	42	0.471496	0.488177	19.2491	6.72143	13.8175	3.65731	27.2288	24.239	43.153	22.5814	21.9556
2021	43	0.647671	0.446327	19.9614	6.34528	14.8754	3.56254	26.8825	27.9568	43.7537	19.4947	22.2343
2021	44	0.757824	0.417264	2.76734	6.39217	14.3429	3.55922	29.863	28.6667	42.6679	19.8629	21.3633
2021	45	0.80538	0.389325	18.2833	5.92645	13.3959	2.91969	24.2356	29.723	39.3314	15.1945	2.46827
2021	46	0.606542	0.371303	22.2746	6.82244	14.1619	3.24859	27.9955	26.5354	47.6463	19.1646	21.5657
2021	47	0.575827	0.348643	16.6944	5.72422	12.7983	2.37281	21.6742	19.7623	34.2292	11.7318	18.3568
2021	48	0.368613	0.334232	17.1773	5.45822	9.86928	3.11878	19.3823	22.1695	33.5985	15.1634	17.5116
2021	49	0.983056	0.315648	15.7137	5.53225	1.27777	3.81235	21.2227	29.194	37.8627	15.459	18.5424
2021	50	0.711337	0.291159	15.7917	5.43694	11.125	3.17882	2.29168	28.6341	4.75287	15.3314	19.4373
2021	51	0.660303	0.269656	19.1543	5.83352	12.387	3.61728	NaN	3.65643	43.3244	17.2668	NaN
2021	52	0.740887	0.249017	26.6736	6.51884	15.6827	3.76994	NaN	32.4561	5.62346	19.374	NaN
2021	53	0.798564	0.227753	26.1982	6.62772	14.8988	3.68432	NaN	26.584	48.9877	19.3145	NaN
2021	55	0.516362	0.192929	21.1442	4.83975	11.8786	3.14853	NaN	37.5965	37.936	18.9181	NaN
2021	56	0.624117	0.177947	24.4358	5.98517	14.1954	3.71579	NaN	39.1388	41.9239	2.74993	NaN
2021	57	0.622662	0.163818	28.7193	6.29333	16.6754	3.33322	NaN	25.7513	43.4344	21.267	NaN
2021	58	0.859557	0.117036	29.8655	8.23238	16.9954	3.36713	NaN	23.6186	49.9173	23.1929	NaN
2021	59	0.816783	0.0952644	27.2465	5.56548	15.9886	3.12485	NaN	24.4776	48.5539	22.3325	NaN
2021	60	0.757254	0.0873654	24.2592	5.96264	14.3866	3.16458	NaN	22.4768	49.5118	19.1276	NaN
2021	61	0.769477	0.0832966	2.33743	4.38958	11.9164	2.5966	NaN	2.48487	37.6862	16.4252	NaN
2021	62	0.383916	0.0764848	8.85557	2.35671	6.32884	0.641975	NaN	9.68682	19.5747	6.25228	NaN
2021	64	0.378151	0.41123	12.7286	5.36194	7.29697	2.38858	NaN	3.24223	3.88564	11.8269	NaN
2021	65	0.371004	0.358609	17.2614	5.53467	8.59528	2.99353	NaN	44.5589	36.1124	18.2354	NaN
2021	70	0.332492	0.391262	8.52955	5.74552	8.31515	3.67526	11.3413	4.77372	4.91876	17.7842	NaN
2021	71	0.490344	0.364402	1.49182	6.95265	1.34898	4.37556	17.956	43.1445	47.7616	21.1811	NaN
2021	72	0.819782	0.332868	9.46759	6.63678	1.58354	3.75133	2.18465	21.4598	44.3746	17.565	NaN
2021	73	0.598185	0.30411	7.54148	5.76776	8.39744	2.96635	13.7121	14.5919	34.4653	16.8596	NaN
2021	74	0.389522	0.28129	6.34573	3.91752	7.28799	2.65992	9.87395	13.7927	3.18679	14.1629	NaN
2021	75	0.247585	0.264455	6.51385	4.35582	7.47826	2.12835	9.38752	14.2156	32.2481	12.7381	NaN
2021	76	0.260842	0.248471	11.6998	5.99519	12.3178	3.97547	17.5978	19.4986	48.9899	14.7564	NaN
2021	77	0.392082	0.226662	9.48885	5.33266	9.74559	3.26567	15.1927	19.6297	38.8548	18.8559	NaN
2021	78	0.426351	0.205976	1.53837	5.85483	9.96466	3.43822	16.4577	23.6162	41.1948	24.3187	NaN
2021	79	0.412707	0.185162	15.6625	5.76137	11.9695	3.91967	18.4795	24.9855	45.5872	16.8399	NaN
2021	80	0.595632	0.0551488	17.6491	6.75192	12.1474	3.83358	13.5644	24.8982	5.61583	19.2613	NaN
2021	81	0.670757	0.0643911	5.14998	0.484285	3.92941	1.55326	4.95971	5.67836	15.3627	6.21824	NaN
2021	82	0.261489	0.0640155	15.1886	6.99913	1.86834	4.75956	14.2945	21.2512	44.6396	19.8784	14.2517
2021	85	0.560322	0.0392184	29.3541	3.49398	11.8658	3.83772	16.5659	18.2347	46.5512	18.863	18.3475
2021	86	0.42082	0.0490748	25.3512	3.22544	11.2378	4.11784	13.5129	21.338	43.1795	17.4445	15.1526
2021	87	0.44487	0.0429284	14.8117	3.14192	12.7993	4.6755	15.3329	24.4787	39.5318	17.3668	9.7472
2021	88	0.612161	0.0368462	29.3221	3.22489	13.3263	4.76293	17.2212	24.59	44.1414	2.93932	12.2811
2021	89	0.772504	0.0293839	29.4958	3.25296	12.9879	4.24942	16.7949	22.7282	42.595	2.65192	15.4414
2021	90	0.511659	0.0228363	21.4937	3.89577	11.3816	3.53472	14.7899	22.9464	36.8293	19.2253	12.1387
2021	91	0.617279	0.0172677	26.1848	3.83954	11.6553	2.64937	15.4668	22.4133	36.1323	19.4473	14.1398
2021	92	0.505743	0.0108003	27.7348	3.4748	13.5362	3.34624	18.129	26.5949	49.8657	23.3469	16.6944
2021	93	0.639781	0.00508722	25.2175	3.34814	11.7286	2.96785	15.2234	22.2393	48.3423	21.7197	14.8263
2021	94	0.841829	4.27605e-17	9.27754	2.24445	6.73188	1.26262	8.79541	1.81356	26.6647	12.8263	15.8594
2021	97	0.152802	0.201066	11.2258	3.18458	7.79714	2.57198	11.9325	1.1562	29.2221	14.8163	12.4285
2021	107	0.380353	0.444016	18.3888	6.94519	1.87727	3.56972	23.9167	36.5964	5.6678	17.5359	18.5322
2021	108	0.415117	0.400783	2.95262	7.26396	11.6277	3.41723	26.8275	43.9874	53.8999	2.42778	18.9338
2021	122	0.3164	0.505529	17.4462	5.7886	8.42977	2.63539	14.8525	NaN	45.6532	17.5651	16.969
2021	128	0.328032	0.453068	17.255	5.62655	8.16719	2.47524	16.1513	NaN	35.7577	12.4281	11.8873
2021	129	0.288192	0.433906	24.242	7.63574	11.7198	3.74182	21.6218	NaN	52.2276	17.3875	13.8511
2021	130	0.346275	0.406593	29.1685	8.19761	14.1962	4.15811	28.3893	NaN	62.3125	19.7666	16.2732
2021	131	0.438913	0.368751	23.5747	6.63363	13.219	4.21125	25.1542	NaN	44.4967	16.8494	14.2244
2021	132	0.376455	0.336318	24.2725	6.98175	13.2681	4.4643	21.1878	NaN	41.9412	18.6896	14.1319
2021	133	0.449439	0.309823	31.7625	8.56348	16.2556	4.79464	27.7267	NaN	6.75337	22.4292	18.4158
2021	134	0.615383	0.279091	33.1881	7.55335	17.1117	4.87815	29.6187	NaN	6.53572	21.693	2.43339
2021	135	0.654641	0.250269	23.7643	7.34964	11.5763	3.63497	22.1286	NaN	45.4235	15.4471	16.2982
2021	136	0.335522	0.23053	17.9724	5.18666	7.68737	2.41242	14.5251	NaN	39.744	11.9927	14.1718
2021	139	0.339191	0.275962	2.86447	6.19579	11.3693	3.68174	18.4227	NaN	46.6147	17.5524	18.5144
2021	141	0.3234	0.249836	21.8866	6.97187	11.774	3.45385	17.5433	NaN	41.1523	17.9352	15.4532
2021	142	0.376593	0.22541	25.9873	6.35278	13.2196	3.88412	17.9775	NaN	4.65589	2.49916	15.4478
2021	144	0.558592	0.242646	25.6815	6.67823	12.6365	4.25338	19.9537	NaN	49.5176	16.7745	2.93628
2021	145	0.382039	0.213856	24.5376	6.25916	11.9891	3.45925	2.48618	NaN	46.8167	19.3254	23.4782
2021	146	0.301212	0.192271	26.9943	6.71255	12.6485	3.83239	22.268	NaN	51.9852	18.5771	25.4273
2021	147	0.375174	0.171537	19.7589	5.25766	9.46836	2.85383	18.1234	NaN	4.84489	13.4666	21.7373
2021	149	0.21697	0.148781	2.74352	5.54695	1.39888	2.87523	14.8933	NaN	36.6539	13.8962	15.8534
2021	152	0.452883	0.156227	3.49249	9.32752	16.8594	4.55667	28.3778	NaN	49.3432	22.7755	16.5513
2021	153	0.542688	0.131048	3.82995	9.64963	15.2339	4.99814	26.1546	NaN	46.5766	22.3587	15.122
2021	154	0.519752	0.112545	27.6995	6.67444	14.7863	4.42722	24.1332	NaN	39.5378	18.8646	15.9947
2021	155	0.427831	0.0987434	29.5185	5.883	14.8614	4.34726	23.8895	NaN	45.6586	19.2983	16.6763
2021	156	0.462685	0.0873333	27.2988	4.53342	14.4468	4.21426	21.1675	NaN	37.415	17.9365	14.1839
2021	157	0.52007	0.0773354	26.383	4.816	11.8685	3.95834	18.2868	NaN	31.7198	17.763	13.1519
2021	169	0.215285	0.502078	26.5236	6.19725	12.2152	4.94745	19.8943	NaN	46.4276	19.3388	13.2345
2021	172	0.43724	0.444472	22.9458	6.68472	1.68516	3.37152	18.1218	NaN	38.9225	16.3471	19.9453
2021	173	0.310819	0.423154	26.5714	6.64165	12.5983	4.66653	2.23515	16.2333	42.3534	17.4977	2.23948
2021	176	0.338127	0.569801	21.8642	6.63141	1.55222	3.64667	17.453	11.7944	3.87668	13.3765	18.6165
2021	177	0.314437	0.511306	21.2397	5.75483	1.31322	3.57846	16.7729	16.7628	33.28	15.3355	23.8532
2021	179	0.36797	0.482564	18.6992	5.95275	9.66732	2.85811	16.2446	17.8377	3.97411	12.6476	19.8576
2021	184	0.391627	0.57078	33.1125	7.55254	16.8638	4.94567	27.8573	16.5875	46.8282	22.2375	19.8392
2021	185	0.632157	0.509412	26.1345	6.18152	13.7528	3.68945	21.9811	19.1455	38.5294	16.5626	18.9584
2021	186	0.40389	0.475094	13.8916	3.31625	6.54356	1.98929	9.43591	6.17525	18.3375	7.86918	9.5795
2021	221	0.239216	0.559562	28.2652	7.28977	14.4984	4.35594	19.4622	22.9751	34.5749	22.1188	15.8766
2021	222	0.309312	0.514644	28.2689	6.54629	14.8917	4.13986	2.45762	22.9838	32.2984	14.4216	18.2275
2021	223	0.310165	0.478327	1.45681	2.21932	6.47584	1.13973	11.2219	9.54646	14.8983	4.42515	8.64652
2021	229	0.190895	0.64184	3.53936	6.93133	14.4119	4.11949	2.51143	35.7848	47.525	18.1224	15.9547
2021	234	0.243565	0.588738	26.5845	5.99599	15.6318	4.88353	2.11652	24.2248	7.54153	NaN	19.6669
2021	236	0.22168	0.531497	2.12339	5.15512	1.59564	2.98643	15.498	9.43612	42.1153	NaN	14.2476
2021	237	0.215114	0.515384	26.9227	5.82749	13.4216	3.51538	18.8172	23.7793	42.6366	NaN	15.883
2021	242	0.191557	0.665046	7.35221	2.52	4.69592	1.15756	5.57626	16.583	21.3927	NaN	8.77394
2021	258	0.150516	0.574567	14.5395	4.17783	8.89383	1.99551	11.8499	14.2398	38.5259	NaN	9.14366
2021	261	0.23359	0.58365	17.5871	4.16134	9.26713	2.49914	12.1149	27.7766	39.3499	NaN	5.22675
2021	263	0.0857854	0.555791	5.96697	1.27268	3.94886	0.642567	6.32376	4.53316	17.6521	NaN	NaN
2021	273	0.268412	0.606358	14.5778	3.35321	8.17621	2.98677	12.6589	6.75698	44.9316	NaN	NaN
2021	278	0.429231	0.566752	27.4993	6.14473	11.7967	4.26731	17.7943	16.4873	6.13764	NaN	NaN
2021	281	0.253864	0.605797	15.5359	4.6344	8.16452	2.46594	11.738	16.8363	39.4219	NaN	NaN
2021	283	0.209859	0.584276	23.7813	5.21127	12.3993	3.51992	18.3391	14.9339	45.7378	NaN	NaN
2021	284	0.211473	0.571202	19.6329	4.6167	9.55274	2.77715	14.4585	9.88352	32.4499	NaN	NaN
2021	293	0.204393	0.61175	14.7679	2.96278	6.57267	2.61253	9.195	5.38516	28.1817	7.3474	13.5287
2021	297	0.148076	0.571823	22.4939	5.89683	12.4131	3.72119	18.4295	26.9287	38.5824	17.5368	18.2127
2021	298	0.262188	0.530965	21.5692	5.48169	12.6914	3.68197	17.6417	13.7688	36.8629	15.6112	17.2823
2021	299	0.302346	0.505593	3.15179	6.41595	17.2413	5.18318	25.8787	16.3473	43.2881	19.1937	21.3491
2021	300	0.438581	0.478423	29.9118	6.25478	15.8395	4.84779	25.4195	15.5243	36.5643	18.4356	2.39979
2021	303	0.263603	0.531302	17.7178	3.85111	9.65926	2.82327	12.3469	16.8763	31.9591	9.77672	27.7645
2021	308	0.373164	0.549885	26.814	5.18123	14.6685	3.96336	21.7192	1.79395	34.4128	11.7615	25.3172
2021	309	0.319991	0.524128	22.8999	5.22159	12.267	4.25521	2.24569	9.76195	4.97152	11.9954	26.4966
2021	310	0.289096	0.498804	17.9239	3.73175	1.12731	3.11848	14.7844	1.98294	31.816	1.46215	22.1333
2021	313	0.227307	0.530804	22.3856	4.17527	11.7982	3.65568	16.4582	12.3396	3.91357	11.382	13.4123
2021	314	0.281022	0.502447	27.5149	6.99899	15.6963	5.1977	23.8223	12.2517	43.8695	16.9196	42.4778
2021	315	0.341717	0.480975	3.99975	4.58647	15.3899	5.29184	23.9558	12.9514	41.5219	16.7649	35.1624
2021	316	0.406779	0.462953	2.65885	3.4877	1.78798	3.36132	14.6572	9.5368	27.1678	9.68476	19.9722
2021	317	0.210788	0.450532	7.82643	1.51578	4.97282	1.63639	5.84838	4.29747	11.7231	2.98445	1.8443
2021	318	0.150207	0.446071	16.3978	2.43913	8.46178	2.39932	9.84875	8.73143	21.2115	6.71772	12.5428
2021	319	0.308475	0.435736	28.4735	3.9787	13.2527	4.83685	19.2627	11.6587	36.1575	13.1447	22.8376
2021	320	0.424035	0.414231	2.24572	3.17631	9.93687	2.86832	15.1747	1.94477	28.5662	9.62265	21.4584
2021	321	0.269122	0.408245	27.726	3.72459	12.9778	4.39349	24.9432	11.2886	36.3143	15.8528	25.2378
2021	322	0.381321	0.386115	9.36452	1.86361	5.72487	1.36115	9.15823	4.96383	14.5329	3.38824	17.1855
2021	323	0.115156	0.38297	26.5664	3.2266	11.6233	4.61455	2.21586	9.95675	36.8791	1.1464	26.6793
2021	325	0.310245	0.347022	33.9646	3.89284	14.8369	5.62172	28.9148	15.6674	45.8453	14.4646	3.79189
2021	326	0.603118	0.324812	35.5737	3.77744	15.5578	5.28818	27.5838	17.1519	44.3317	16.3554	36.2632
2021	327	0.548212	0.303083	9.4225	1.88516	6.23822	1.61962	9.54663	6.89637	17.425	5.3298	13.3731
2021	328	0.140878	0.296615	27.6242	3.89755	13.338	4.97959	22.3218	14.24	38.7262	14.5439	28.8616
2021	329	0.350822	0.279219	31.7334	4.33128	15.2519	5.56973	28.2587	15.7826	46.269	15.6619	32.5684
2021	330	0.417276	0.262289	26.6537	3.91293	13.3949	4.9795	26.8515	14.2379	38.2618	13.6475	32.1526
2021	331	0.392819	0.247043	27.9422	3.36566	13.4423	4.82763	25.7337	15.5482	35.8786	13.6119	33.5198
2021	332	0.513337	0.231396	27.1233	3.18423	12.7367	4.43678	22.2856	14.5317	3.89187	12.3989	27.4956
2021	333	0.585508	0.216151	22.7459	3.49975	12.2879	4.34396	2.4477	11.9719	29.2134	13.7654	26.8368
2021	334	0.635252	0.20182	16.1131	3.25647	1.36638	3.54789	14.6896	8.34985	24.4467	1.22757	23.9389
2021	335	0.499854	0.193186	23.7792	3.22944	11.4339	4.16339	19.7458	11.9784	28.8552	11.8987	35.9424
2021	336	0.476633	0.18237	18.8929	3.25218	1.32377	3.42995	13.9847	9.76783	26.4113	8.85939	37.4294
2021	337	0.413744	0.174025	26.7849	4.11598	14.7678	5.68327	29.7487	16.5266	35.4892	15.3285	19.5754
2021	338	0.658229	0.164412	29.1998	4.13672	15.3375	5.36692	29.5117	18.3723	39.1954	15.4969	19.4257
2021	339	0.552731	0.155987	27.5456	4.73735	14.7422	4.83538	26.9643	15.4232	4.33191	15.3132	27.1492
2021	340	0.543638	0.1496	34.5124	4.78142	16.2745	5.37448	29.8194	22.2314	48.1357	16.415	16.8515
2021	341	0.663376	0.143646	33.6292	4.28419	15.3891	5.94724	29.6826	25.3635	42.7343	16.1548	58.1847
2021	342	0.757987	0.137178	31.2226	4.46253	14.752	4.96399	23.4296	19.3596	38.2944	15.4279	62.5939
2021	343	0.613864	0.131209	21.2697	3.13656	11.5629	3.51485	17.7985	17.9735	29.7985	9.92635	3.87424
2021	344	0.350896	0.127261	26.8385	3.55233	14.1833	4.96799	24.6231	17.2299	38.2186	13.2412	81.9356
2021	345	0.484059	0.123217	27.9793	3.81156	14.3737	5.89274	28.4163	19.2142	39.325	14.6784	9.9978
2021	346	0.646586	0.11683	23.566	3.24865	12.9214	4.57525	22.7943	16.8555	31.4634	11.5487	21.8117
2021	347	0.500014	0.113122	2.98456	3.26468	12.2778	3.79794	22.8457	17.9264	3.74222	12.1953	45.7666
2021	348	0.450591	0.10895	24.4562	3.41636	13.2693	4.45458	25.9977	31.9382	35.6157	11.7475	28.7552
2021	349	0.457548	0.10497	35.8211	4.98467	15.9937	5.39734	28.843	46.7943	46.483	13.1587	29.1963
2021	350	0.498026	0.101777	4.76731	3.71383	16.5759	5.51575	31.5451	48.1484	51.1165	13.3799	25.5355
2021	351	0.618878	0.098936	3.25145	3.14444	13.7186	4.69987	23.585	29.9536	36.5643	12.7415	19.1762
2021	352	0.566157	0.0959832	23.2617	3.37268	12.5967	4.1162	22.7738	2.89558	28.3776	13.14	24.4468
2021	353	0.562221	0.0914095	23.7234	3.71583	12.6777	4.55552	19.1882	39.1616	34.2195	12.5732	32.1589
2021	354	0.417404	0.0887295	34.7158	3.84867	15.2299	4.61953	28.1279	48.3177	45.1643	14.4426	27.4489
2021	355	0.439914	0.0858408	4.99846	3.69145	16.3314	4.88877	27.8464	48.7359	52.5284	15.5662	22.7294
2021	356	0.556868	0.0833052	34.7346	3.18154	14.2558	5.24299	22.4356	4.18957	44.4256	13.1689	21.4834
2021	357	0.594491	0.0814276	34.4675	3.36798	13.9759	5.35839	22.2821	46.1255	41.1888	13.5788	24.5839
2021	358	0.406314	0.0797586	28.4896	3.39833	11.7245	4.11619	18.6338	33.6966	34.3568	12.5678	18.4812
2021	359	0.400603	0.0789402	22.7523	2.55496	1.31748	3.53149	16.543	27.9228	26.9227	1.12299	18.2891
2021	361	0.307658	0.0804648	29.6117	3.21942	14.5442	4.66421	29.6862	33.4121	38.4512	13.8884	23.9555
2021	362	0.441895	0.0773996	28.8298	3.53839	14.2225	5.15235	23.2278	33.3362	39.3846	15.7517	22.8815
2021	363	0.515373	0.0743344	28.413	3.66482	14.4957	4.71745	23.3939	33.1698	36.8186	16.1858	23.1191
2021	364	0.456512	0.0717025	24.8764	2.74864	11.4974	3.68699	2.24233	32.1199	29.3749	13.5283	17.2996
2021	365	0.383173	0.0706434	2.76379	2.57264	1.92613	3.57	16.5139	19.5549	24.5729	11.3243	9.65652
2022	1	0.390434	0.0679152	23.7256	2.67348	11.7122	NaN	18.2171	18.9349	29.3436	12.3339	14.2898
2022	2	0.302215	0.0664709	22.7518	2.84661	11.7496	NaN	17.937	25.5559	28.1498	11.8514	13.6723
2022	3	0.389339	0.0650266	33.4225	3.28313	14.2665	NaN	25.2297	37.832	37.9256	14.2473	2.87519
2022	4	0.421933	0.0629403	31.1677	3.46975	12.5359	NaN	2.93355	26.213	35.9942	13.8724	19.4473
2022	5	0.713943	0.0622342	19.6173	3.42932	15.9294	NaN	27.6592	49.9178	46.6814	18.5173	19.19
2022	6	0.873689	0.0595542	21.1791	3.19316	16.1472	NaN	23.769	51.3217	51.595	19.9518	19.7341
2022	7	0.809945	0.0572433	17.6327	3.16156	15.2165	NaN	21.5347	37.8266	46.8949	18.4937	22.8974
2022	8	0.852252	0.055815	21.2452	3.35875	16.4855	NaN	27.2796	55.5472	51.3882	19.6723	2.14635
2022	9	0.696829	0.053472	21.3782	3.35173	15.6584	NaN	26.4383	55.4635	48.2289	19.3912	18.2859
2022	10	0.790865	0.0525893	2.2977	3.46625	15.7566	NaN	24.7131	57.6259	48.8943	19.5497	15.8755
2022	11	0.970242	0.0506315	21.2272	3.19221	15.8137	NaN	25.2174	58.3833	5.83815	21.6436	17.5415
2022	12	0.731336	0.0485452	15.6339	2.57522	14.3577	NaN	2.44165	43.4793	4.38437	16.79	19.9879
2022	13	1.05671	0.048144	17.9337	2.82683	15.2214	NaN	23.8748	52.124	44.7732	19.1772	18.4752
2022	14	0.696329	0.0462183	19.112	3.19355	14.8217	4.54276	23.7775	63.9617	49.3476	19.3469	2.73356
2022	15	0.674301	0.0447258	18.7545	3.94817	14.2919	NaN	21.7967	55.2627	48.7432	18.9396	18.5223
2022	16	0.604743	0.0440206	17.4423	2.89335	13.7824	NaN	2.66622	49.7892	44.7672	18.1181	16.2987
2022	17	0.705627	0.0423989	15.4149	2.75122	12.8428	NaN	18.4576	42.7348	38.1626	16.143	18.5157
2022	18	0.849434	0.0382424	19.2665	3.25738	14.9741	NaN	22.1928	79.8269	43.7773	18.5467	24.5122
2022	19	0.607479	0.0410348	34.3336	2.77354	13.6213	NaN	18.8429	51.137	4.55575	15.8234	18.243
2022	20	0.552878	0.0404731	24.6985	2.12584	1.85264	NaN	1.18212	34.2533	27.7285	1.75622	12.1247
2022	25	0.816075	0.0582543	36.3179	2.98715	14.7964	NaN	17.8233	47.1414	47.4993	17.313	15.4656
2022	26	0.729973	0.0541941	35.1247	3.61139	15.2644	NaN	16.8245	48.9989	44.9441	17.9862	16.6975
2022	29	0.467115	0.0592493	28.3665	2.87335	13.6168	NaN	17.9815	34.6612	36.7187	14.8316	9.69551
2022	30	0.679254	0.0548725	28.5578	2.76466	13.387	NaN	19.3142	39.8154	4.69942	17.8279	13.1788
2022	31	0.50004	0.0500056	27.8576	2.87144	14.2741	NaN	17.7242	4.6232	45.2364	19.3434	15.5356
2022	32	0.387556	0.0474219	17.8129	2.43395	11.3391	NaN	13.5273	3.5995	32.9752	16.9492	27.9816
2022	35	0.316786	0.0686374	14.4241	2.54982	9.36289	NaN	11.2866	28.5547	28.5829	1.61628	14.9568
2022	36	0.625349	0.0626354	16.3346	2.86917	1.82516	NaN	13.4296	4.77495	3.86677	14.9143	1.98516
2022	37	0.558416	0.0562483	17.1865	2.69429	11.366	NaN	12.1668	39.8178	31.6126	15.2355	19.5287
2022	38	0.550976	0.0516907	19.3843	2.61532	11.1537	NaN	12.7452	35.4834	34.2857	14.5428	2.68373
2022	39	0.603047	0.0489304	19.1255	2.65871	11.1892	NaN	12.9392	36.8737	35.9472	16.1157	25.6399
2022	53	0.319742	0.500794	18.2283	5.33367	13.6138	NaN	14.3218	39.4872	45.9627	21.7751	25.9423
2022	54	0.560842	0.47446	29.1343	6.88882	18.6523	NaN	21.9476	48.7673	55.6331	3.95544	19.6446
2022	55	0.732033	0.43779	29.6876	6.46552	19.997	NaN	22.1486	47.7334	55.3225	29.6276	23.3737
2022	56	0.843988	0.404442	29.9954	6.56762	2.26525	NaN	22.3125	52.9965	55.3578	29.2163	2.78188
2022	57	1.03987	0.374529	32.822	6.78248	2.74695	NaN	22.2612	6.68213	61.9849	25.4912	21.9481
2022	58	1.0003	0.346621	36.554	4.29595	2.36733	NaN	21.8976	72.3518	69.6879	25.5833	22.5415
2022	59	0.756619	0.319436	37.7362	4.86392	19.2197	NaN	22.1593	48.7728	69.8725	25.5124	16.7755
2022	60	0.530819	0.294144	31.5944	3.67453	17.17	NaN	19.7974	46.5182	61.9876	22.6411	18.9312
2022	61	0.339803	0.274903	21.1839	2.88597	12.7919	NaN	14.4422	39.1729	43.8537	16.5677	18.9547
2022	68	0.304427	0.516089	18.1111	2.87866	12.4664	NaN	12.2381	49.2464	25.7264	18.5892	19.2492
2022	74	0.440182	0.395696	25.3617	3.48515	16.5493	NaN	17.4387	51.7666	25.3174	23.6752	17.4187
2022	75	0.269238	0.368452	19.6626	2.83118	13.5414	NaN	14.1687	46.2782	41.962	18.5753	16.1759
2022	84	0.26161	0.464751	25.5487	3.46822	16.8169	NaN	18.6361	NaN	33.1197	27.5714	16.2348
2022	86	0.517063	0.395006	32.6247	4.42925	2.45743	NaN	24.9738	NaN	41.6728	29.7668	25.3751
2022	87	0.565883	0.374288	3.3356	4.39453	19.332	NaN	23.5129	NaN	33.5273	24.652	22.44
2022	88	0.386831	0.338896	21.9562	3.4189	14.3413	NaN	17.4326	NaN	25.4236	17.7416	19.9714
2022	90	0.525019	0.498254	3.12238	4.54955	18.8553	NaN	22.312	NaN	33.8835	29.5375	25.7717
2022	94	0.5927	0.477862	22.946	4.43563	15.6311	3.21469	17.1987	NaN	22.4465	38.2287	14.5137
2022	95	0.770563	0.411519	31.9495	5.49485	22.1639	4.68252	24.1442	NaN	37.7742	44.9847	17.7179
2022	96	0.651341	0.370404	3.11154	4.35346	19.8379	3.37537	22.7357	NaN	39.1164	47.1548	18.7167
2022	97	0.773722	0.401682	23.2599	3.97366	15.6415	3.27212	16.6692	NaN	3.37574	31.9573	19.435
2022	98	1.01673	0.317924	25.6726	4.31267	16.8582	2.91168	17.1443	NaN	31.5166	3.85312	18.7781
2022	99	0.816814	0.260828	32.4721	4.42436	18.8967	1.79363	18.9693	NaN	33.7238	31.5833	15.7635
2022	100	0.626639	0.242956	32.7645	4.37188	17.1526	0.878962	18.292	NaN	33.1469	3.69428	13.9483
2022	103	0.451122	0.29239	32.1148	4.13328	18.218	5.62776	19.4839	NaN	35.3296	37.1257	13.3488
2022	104	0.615739	0.251845	39.7694	4.24758	18.1135	3.69419	19.6925	NaN	36.5458	37.7856	16.6876
2022	105	0.652305	0.21652	33.9445	3.64845	18.5224	2.24115	2.16684	NaN	36.7956	35.5645	18.3954
2022	106	0.74007	0.191506	24.3183	4.39618	17.2275	1.31956	19.5415	NaN	37.9459	33.9661	16.2237
2022	113	0.546939	0.371592	27.2348	4.74134	19.2819	0.614232	18.917	NaN	32.8413	45.9441	21.6224
2022	114	0.449916	0.377369	25.2756	3.77354	18.9166	0.528784	17.8362	NaN	34.6616	32.5516	14.1862
2022	115	0.494749	0.290646	26.3313	4.14324	19.1695	0.462694	16.4454	NaN	33.8589	31.4629	11.5532
2022	116	0.413658	0.254943	25.8665	3.99734	18.4318	0.784125	15.1529	NaN	26.7899	32.6754	12.5483
2022	143	0.246592	0.627638	21.2643	5.93828	13.8375	2.24793	17.8858	7.21715	32.1452	21.4367	13.5414
2022	153	0.341423	0.559129	3.26472	4.34233	18.9932	1.89139	21.2877	8.58411	43.1582	32.2766	15.7218
2022	158	0.444685	0.630157	31.6114	4.65112	2.34166	4.83325	26.6446	17.3356	49.7697	37.9346	19.1374
2022	159	0.458038	0.548595	34.872	4.33489	22.9915	2.84923	26.1954	16.239	47.9824	4.17838	2.44842
2022	163	0.288558	0.602234	24.4555	3.12298	15.4962	2.19154	17.3623	9.25382	38.7495	29.4957	14.3332
2022	164	0.271857	0.563959	21.5668	3.46359	15.7995	1.28814	17.3866	8.96297	39.1716	24.9713	18.7353
2022	165	0.283486	0.531899	29.1259	4.11944	18.8781	1.64385	23.1681	13.8221	48.678	36.6135	16.7436
2022	167	0.309164	0.5936	31.3123	4.14119	2.49434	2.57659	21.3714	19.1135	36.972	4.75542	23.9396
2022	168	0.273508	0.544461	32.4727	4.55836	19.5745	2.33416	2.65334	18.2744	68.7258	41.7446	21.1836
2022	174	0.234459	0.560573	22.9783	3.16222	16.3637	1.29814	15.9239	14.5579	36.3187	28.5839	16.1429
2022	176	0.220602	0.518752	24.4798	3.39432	15.8725	1.74437	18.2562	14.6488	36.2713	29.8972	22.3567
2022	177	0.259579	0.487956	24.3573	3.97548	17.3388	4.43459	19.4589	13.2189	39.7667	3.73332	27.9235
2022	180	0.310642	0.403543	31.6561	4.65239	21.8858	3.51295	23.5562	13.6894	5.37678	39.1828	19.189
2022	188	0.194725	0.586507	17.877	3.34968	14.9537	3.19564	17.3198	18.3713	34.9137	29.8192	19.2662
2022	195	0.215859	0.5967	22.9531	3.68711	16.5427	8.62936	17.3369	18.4617	37.6752	24.5799	22.1294
2022	196	0.209782	0.553994	24.3466	3.98952	18.4752	3.76444	19.9646	15.4312	42.6641	3.64531	2.69477
2022	197	0.233388	0.544609	23.5121	4.48156	19.4689	5.39313	2.82714	12.1817	44.593	35.3465	18.6548
2022	198	0.221333	0.51596	21.2915	4.21464	18.1677	4.24973	19.8279	1.85874	4.37396	27.8223	19.9833
2022	199	0.257389	0.491198	2.44165	3.9944	17.4617	3.4868	19.7257	8.7849	39.2281	25.6587	18.2993
2022	211	0.195408	0.611606	21.1513	5.74267	16.1332	6.39921	18.1465	16.6678	42.5224	26.1924	4.38868
2022	226	0.218131	0.65118	21.7273	6.58321	16.297	3.41954	18.9854	21.4993	36.942	31.5996	17.3673
2022	246	0.223388	0.642803	22.1733	8.27767	15.3714	3.19253	17.8679	19.963	33.2374	15.1688	14.3727
2022	254	0.148681	0.65867	18.3471	3.38529	13.9336	1.38681	14.6937	22.5533	27.4385	NaN	11.3984
2022	284	0.13407	0.742494	16.7636	4.46854	12.4196	3.25954	12.1759	15.1622	36.1375	NaN	18.5214
2022	285	0.458467	0.666265	3.82866	7.52286	2.95918	4.62661	23.4255	2.91564	5.5727	NaN	23.5148
2022	286	0.471047	0.619566	34.9532	8.83684	23.3386	6.629	24.6513	24.2538	51.8152	NaN	23.3446
2022	287	0.481822	0.591064	28.9488	4.88213	2.11633	6.38219	19.5124	24.5927	42.4715	NaN	26.4465
2022	290	0.669813	0.62093	21.443	6.57825	17.5696	2.15566	19.5383	13.7875	42.6532	NaN	15.5532
2022	291	0.827184	0.575337	25.4892	4.75995	17.2457	3.55113	2.96927	13.1138	38.2955	NaN	17.6764
2022	292	0.682614	0.543129	26.457	4.43865	2.36262	8.81233	22.7673	24.9579	4.57796	NaN	18.7459
2022	293	0.4855	0.517324	25.2147	4.18985	19.4892	6.12846	21.6873	2.84545	43.5512	NaN	22.5559
2022	294	0.251229	0.502431	16.1323	2.91323	13.3935	6.51332	14.5474	16.2447	25.9774	NaN	12.7666
2022	295	0.293463	0.491053	21.2227	3.84211	16.6543	6.74866	17.6873	14.4795	34.9235	NaN	18.1977
2022	296	0.41044	0.470945	29.6634	4.55867	21.6327	4.45379	22.2747	15.6861	41.1188	NaN	18.6547
2022	297	0.61132	0.446536	34.7784	4.65683	22.9489	5.8266	23.8838	14.5587	47.1877	NaN	19.7498
2022	298	0.496496	0.422737	29.6985	3.91189	18.1355	6.1579	18.9445	16.1634	43.6637	NaN	17.3376
2022	301	0.270375	0.669374	17.8587	2.89638	12.9157	4.83843	14.5278	11.58	25.3374	NaN	13.6774
2022	302	0.451221	0.62016	19.3938	3.53351	15.2422	6.23326	16.7987	1.62263	34.9423	NaN	13.7516
2022	303	0.555051	0.582185	25.8236	4.47296	18.2822	6.59441	21.7613	15.5149	44.3556	NaN	16.5879
2022	304	0.514385	0.553849	24.3756	4.23276	15.7316	4.95436	19.3227	15.3755	39.2337	NaN	24.1793
2022	305	0.570772	0.527964	26.7898	4.83337	18.7237	5.31617	24.8367	17.4222	43.2159	NaN	39.4422
2022	306	0.64619	0.504534	35.9768	4.8997	25.1498	3.23515	25.1773	17.3897	51.4484	NaN	3.12488
2022	307	0.680323	0.482259	37.6663	4.58926	25.2959	0.575516	24.4483	14.2372	49.7613	NaN	22.2711
2022	308	0.859283	0.459695	42.9763	5.27523	26.8611	3.37594	26.1621	18.62	52.7279	NaN	29.3368
2022	309	0.527027	0.439363	31.5587	4.79868	2.86219	6.32862	21.552	15.8192	45.1314	NaN	19.9244
2022	310	0.46279	0.422239	25.8833	4.37854	17.678	9.73717	17.5956	14.9771	36.3814	NaN	1.98346
2022	311	0.554734	0.407106	26.8399	4.28918	19.4497	11.6189	19.5764	14.8772	38.1185	NaN	11.3483
2022	312	0.652089	0.512686	26.9472	4.33135	21.7219	16.4443	2.95439	14.7258	43.9665	NaN	16.9558
2022	313	0.609488	0.411551	23.5628	4.93486	22.9315	11.5947	23.6529	15.8682	48.9115	NaN	18.1362
2022	314	0.511521	0.340582	23.4275	4.74238	22.3781	9.62743	23.2916	14.5437	45.6213	NaN	19.7373
2022	315	0.432286	0.327401	21.5828	4.26157	2.63978	17.6162	21.563	15.2574	42.4831	NaN	23.1224
2022	316	0.530508	0.314156	2.13996	4.12394	18.6459	1.77142	19.1196	16.8973	39.4764	NaN	9.12458
2022	320	0.212111	0.409677	2.23442	2.94463	13.4239	2.29526	11.5125	2.1422	34.2324	3.5996	8.44882
2022	325	0.318189	0.590824	14.5948	3.69763	11.9493	2.45622	1.63924	15.1933	19.9886	NaN	18.5472
2022	326	0.461735	0.562254	25.949	4.71197	2.22528	6.22312	21.3158	24.6848	41.9967	NaN	25.2495

## Sheet: Heading
Tree number	Species	DBH (cm)		Heading	Description
1	Adinandra integerrima	13.7		Year	year
2	Adinandra integerrima	6.5		DOY	day of year
3	Adinandra integerrima	11		VPD	daily average vapor pressure deficit (kPa)
4	Adinandra integerrima	5.3		REW	Relative Extractable Water
5	Adinandra integerrima	11.3		T1-T9	tree water use (L/day)
6	Syzygium antisepticum	24.8
7	Syzygium antisepticum	22.4
8	Syzygium antisepticum	18.7
9	Syzygium antisepticum	17.8
